# Supplementary material
Source: PubMed Central journal article supplement (PMC3871247)

## **SUPPLEMENTARY FIGURE LEGENDS**

### **Figure S1: TTC7A mutations in MIA-CID patients**

Electropherograms of TTC7A mutations identified in MIA-CID patients A9, B3, C3, D3, E3 and F3. Sequencing of cDNA from A1 and A2 (the mother and father of A9) highlighted heterozygous deletions of exons 2 and 3 and of exon 2, respectively. The serine substitution (S569L) in patient D3 inherited from her mother occurred in a residue that has been well conserved over evolution. Sequencing of cDNA obtained from her father D2 (after cloning of the lower band) highlighted an heterozygous 4 bp deletion in exon 11 associated with exon 12 deletion. For F3, sequencing of cDNA obtained from his father (F2) highlighted an heterozygous deletion of exon 12.

### **Figure S2: Efficient epithelial outgrowth from patient-derived intestinal biopsies**

**A.** Ileum biopsy from a severely affected region. The magnified image shows the only epithelial villus that could be found in this specimen (black arrow). Scale bars: 1 mm. **B.** Time course of organoid growth after seeding (from the patient biopsy shown in A). Red arrows show epithelial structures and blue arrows show non-epithelial tissues that do not expand. Scale bars: 0.1 mm. **C.** Organoids ten days after seeding with a duodenal biopsy from another patient. Overview images (left) show efficient epithelial outgrowth and detailed images (right) show representative examples of organoids with disturbed epithelial morphology. Scale bars: 0.1 mm.

### **Supplementary videos 1 and 2**

Time lapse imaging of patient (MUT) and control (WT) organoids. Bright field microscopical images were acquired in 30 min intervals 2 days after seeding and during a total period of 2

days (time points are shown as hours:min:seconds). Control organoids are single layered and undergo a continuous budding process. Patient cultures are characterized by the formation of multiple vacuoles and undergo cycles of swelling and collapsing. Both were cultured in the presence of Y-27632.

PATIENT A9

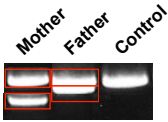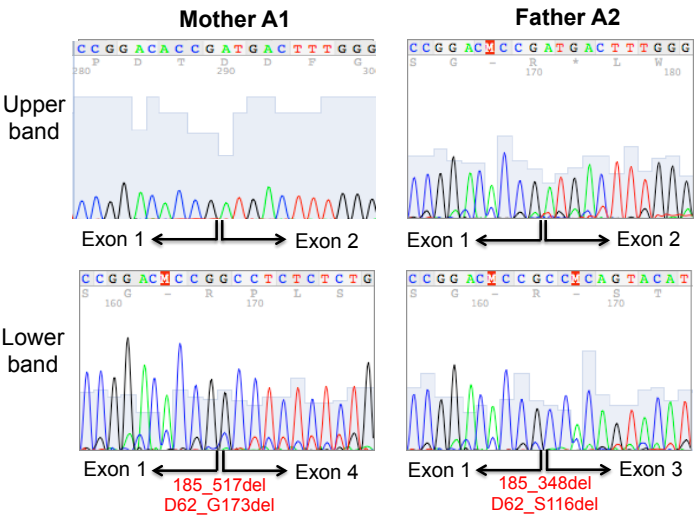

PATIENT B3

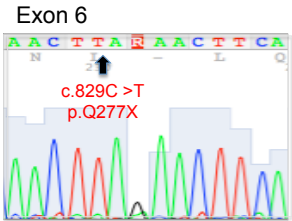

PATIENT C3

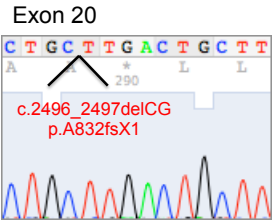

PATIENT D3

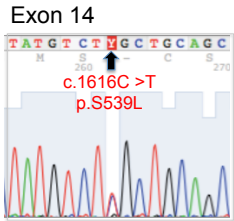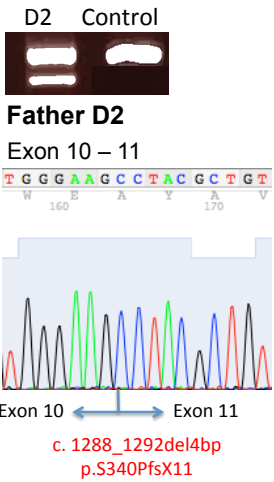

Amino acid substitution

|            |                             |
|------------|-----------------------------|
| Human      | RAQQLAPSDPQVILYVSLQLALVRQ-  |
| Gorilla    | RAQQLAPSDPQVILYVSLQLALVRQ-  |
| Chimpanzee | RAQQLAPSDPQVILYVSLQLALIRQ-  |
| Cow        | RAQQLAPGDPQVILYVSLQLALVRQ-  |
| Cat        | RAQQLAPGDPQVILYVSLQLALVRQ-  |
| Dog        | RAQQLAPGDPQVILYVSLQLALVRQ-  |
| Dolphin    | XAQQLAPDDPQVILYVSLQLALVRQI  |
| Elephant   | RAQQLAPDDPQVTLIYISLQLALVRQ- |
| Mouse      | RARELAPDDPQIIIFYVALQLALVRQ- |
| Zebrafish  | ATLKADCDEFN---RRALQ-SLRR--  |
|            | : : . : : : * * * *         |

PATIENT E3

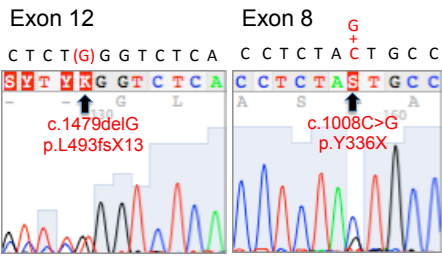

PATIENT F3

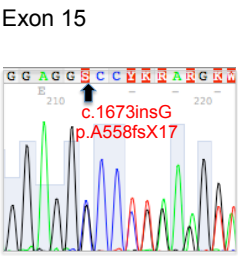

Father F2

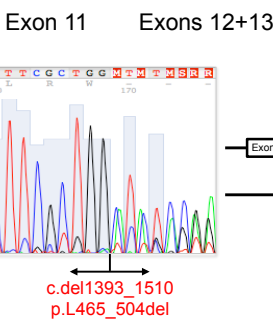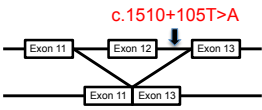

Fig. S2

**A** patient biopsy

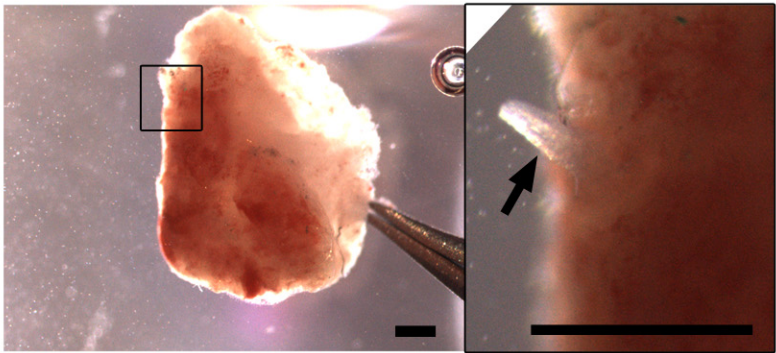

**B** day 2      day 3      day 4      day 5      day 6      day 7

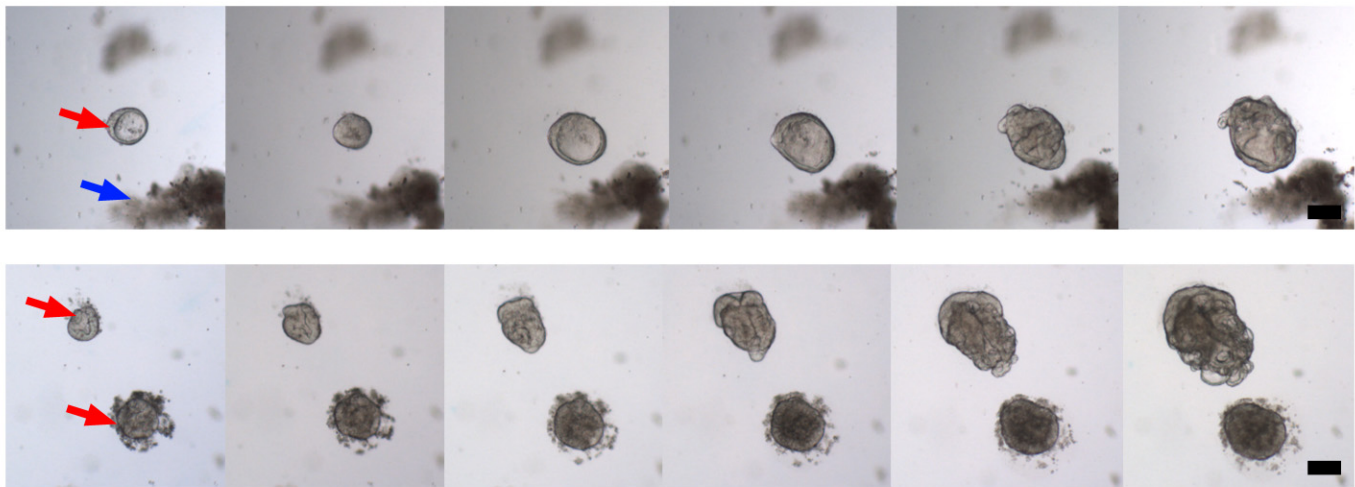

**C** day 10

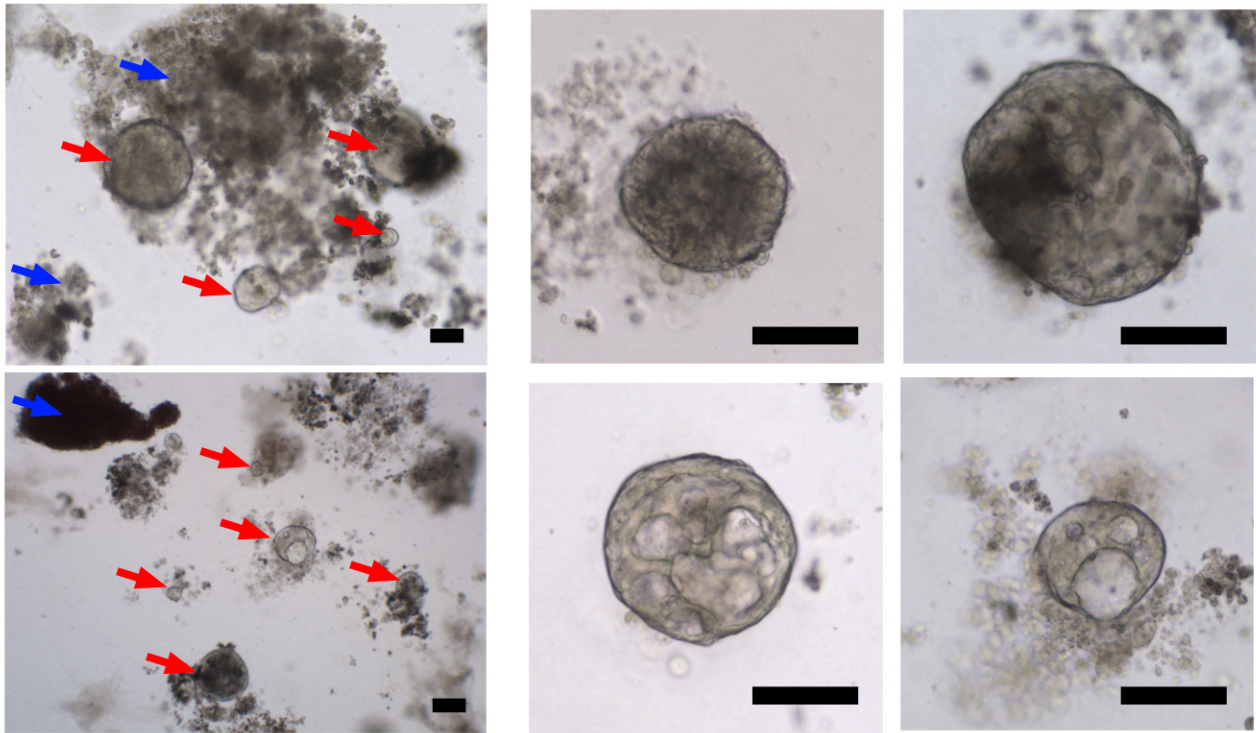

Supplement: JCI71471sd.pdf [file JCI71471sd.pdf]
